# Supplementary material
Source: Springer Nature journal article supplement (https://www.springermedizin.de/resource/supplementary/12936_2011_1723_MOESM1_ESM.pdf/9541628)

11°24'32"E

11°31'02"E

11°37'72"E

Yaoundé

Douala

3°55'14"N

3°51'58"N

3°48'02"N

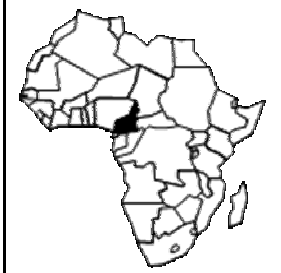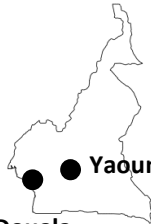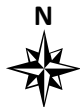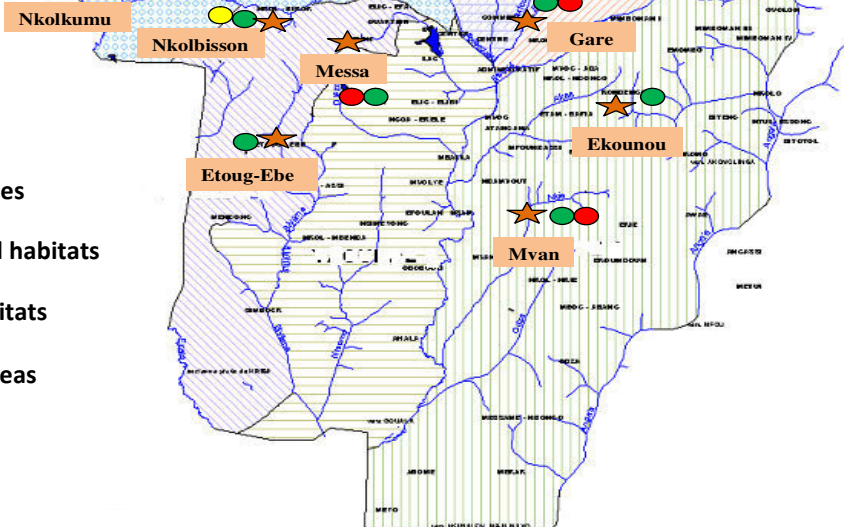

Rivers

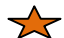

Collection sites

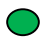

Non polluted habitats

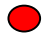

Polluted habitats

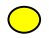

Cultivated areas

0

4Km

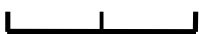

Supplement: MOESM1 [file 9541628]
